# Supplementary material for: Quantitative assessment of eye movements using a binocular paradigm: comparison among amblyopic, cured amblyopic and normal children
Source: Research Square preprint supplement (doi:10.21203/rs.3.rs-1542608/v1), 2022-04-13
Supplement: Supplementary file 1 [file f53fafbc97e0968b39d9921b.xlsx]

## Sheet: Table S1
Table S1. Repeated measures for deviations in total and separate groups.
	Total (n=102)		Control (n=41)		Amblyopia (n=26)		Cured Amblyopia (n=35)
		p value		p value		p value		p value
Fixation
Fix-X		0.457		0.121		0.08		0.268
Test1	1.75 (0.98, 3.03)		1.58 (0.84, 2.60)		2.58 (1.40, 5.30)		1.45 (0.83, 2.96)
Test2	1.83 (0.97, 2.73)		1.10 (0.71, 2.31)		3.00 (1.89, 5.16)		1.80 (0.98, 2.70)
Fix-Y		0.518		0.554		0.096		0.876
Test1	2.30 (1.73, 3.33)		2.18 (1.56, 2.61)		3.10 (2.19, 4.50)		1.93 (1.53, 3.20)
Test2	2.11 (1.49, 3.05)		1.83 (1.38, 2.53)		3.05 (2.31, 5.78)		2.00 (1.18, 2.68)
Saccade
Sac-X		0.147		0.172		0.809		0.235
Test1	4.10 (2.50, 6.90)		3.28 (1.79, 4.19)		7.35 (4.93, 10.01)		3.78 (2.38, 5.93)
Test2	3.86 (2.18, 5.98)		3.33 (1.63, 4.51)		6.53 (3.76, 9.24)		2.98 (2.08, 5.78)
Sac-Y		0.463		0.058		0.767		0.87
Test1	3.20 (2.20, 4.85)		2.48 (1.71, 3.65)		4.45 (3.15, 5.85)		2.98 (2.11, 4.96)
Test2	2.93 (2.35, 4.69)		2.78 (2.31, 3.55)		3.70 (2.36, 6.05)		2.98 (2.35, 4.75)
Fix-X/ Fix-Y: horizontal/ vertical deviation of the circular fixation test; Sac-X/ Sac-Y: horizontal/ vertical deviation of the horizontal saccade test. Wilcoxon Signed Ranks tests were used to compare results of twice repeated measures.
